# Supplementary material for: Activation of the adipocyte CREB/CRTC pathway in obesity
Source: PubMed Central journal article supplement (PMC8536733; doi:10.1038/s42003-021-02735-5), 2021-10-22
Supplement: 42003_2021_2735_MOESM1_ESM.pdf [file 42003_2021_2735_MOESM1_ESM.pdf]

## Supplementary information

### Activation of the Adipocyte CREB/CRTC Pathway in Obesity

Young-Sil Yoon<sup>1</sup>, Weiyi Liu<sup>1</sup>, Sam Van de Velde<sup>1</sup>, Shigenobu Matsumura<sup>2</sup>, Ezra Wiater<sup>1</sup>, Ling Huang<sup>3</sup>, Marc Montminy<sup>1\*</sup>

<sup>1</sup>Peptide Biology Laboratories, The Salk Institute for Biological Studies, La Jolla, CA 92037, USA

<sup>2</sup>Department of Clinical Nutrition, Osaka Prefecture University, Habikino, Habikino-city, Osaka, Japan

<sup>3</sup>The Razavi Newman Integrative Genomics and Bioinformatics Core The Salk Institute for Biological Studies, La Jolla, CA 92037, USA

Supplementary Figure 1-10

Supplementary Table 1

Supplementary Data (Supplemental item 1-2: FACS Gating strategy)

**a**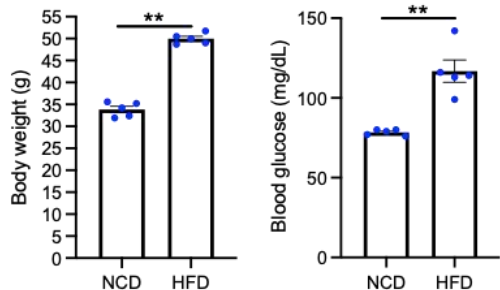**b**

Continued from Fig.1d (eWAT)

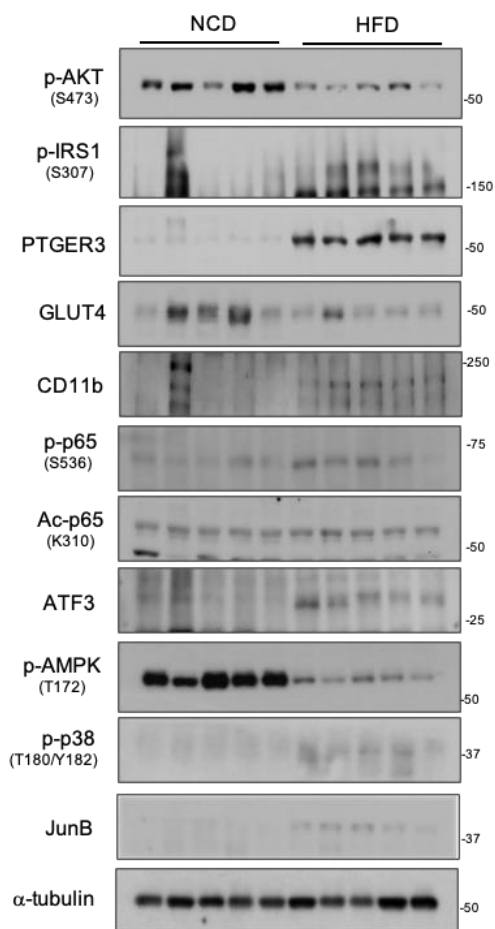**c**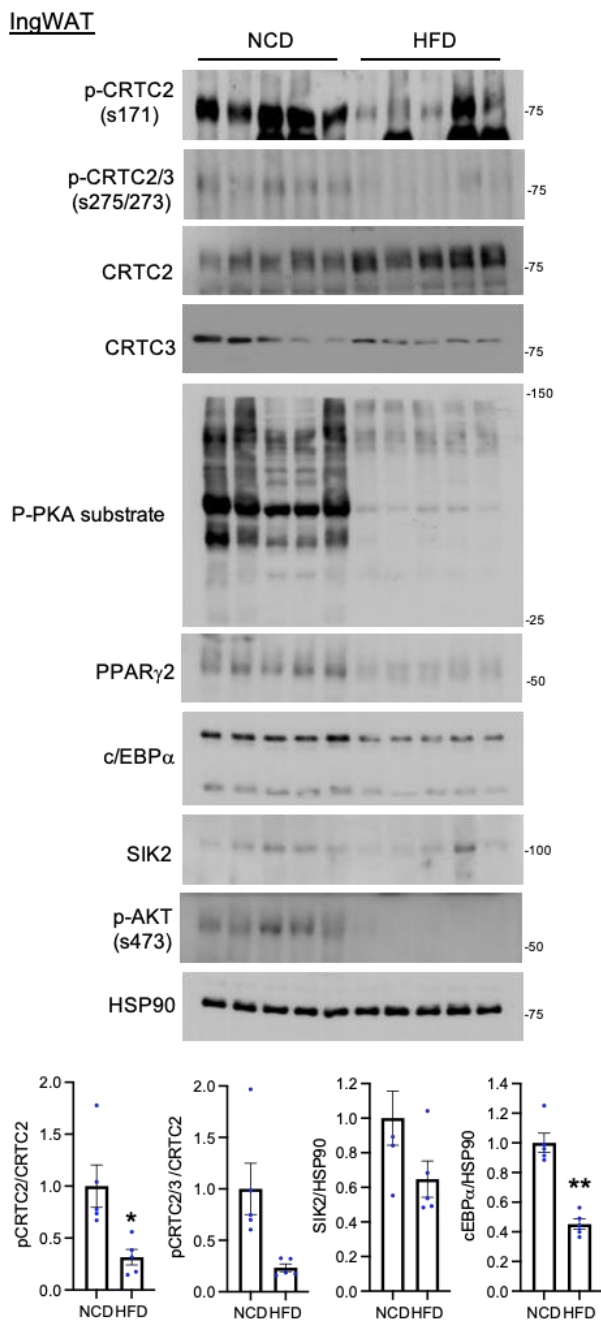**Supplementary Fig 1. PKA activity in WAT from diet induced obese mice.**

**a.** Body weight (left) and blood glucose concentrations of overnight fasted C57BL/6J mice maintained on NCD or 15weeks HFD (\*\* $P < 0.01$ , t-test;  $n = 5$  per group). **b.** Western blotting analysis of eWAT from age-matched NCD and HFD fed (15 weeks) mice. Data are continued from Fig 1d. **c.** Western blotting analysis of inguinal WAT (iWAT) from age-matched NCD and HFD fed (15 weeks) mice. Samples were prepared from mice in Fig 1d. Each lane represents a sample of one animal. Bottom, densitometry analysis showing decreased CRTC phosphorylation, c/EBP $\alpha$ , SIK2 expression (\*\* $P < 0.01$ , \* $P < 0.05$ , t-test;  $n = 5$  per group).

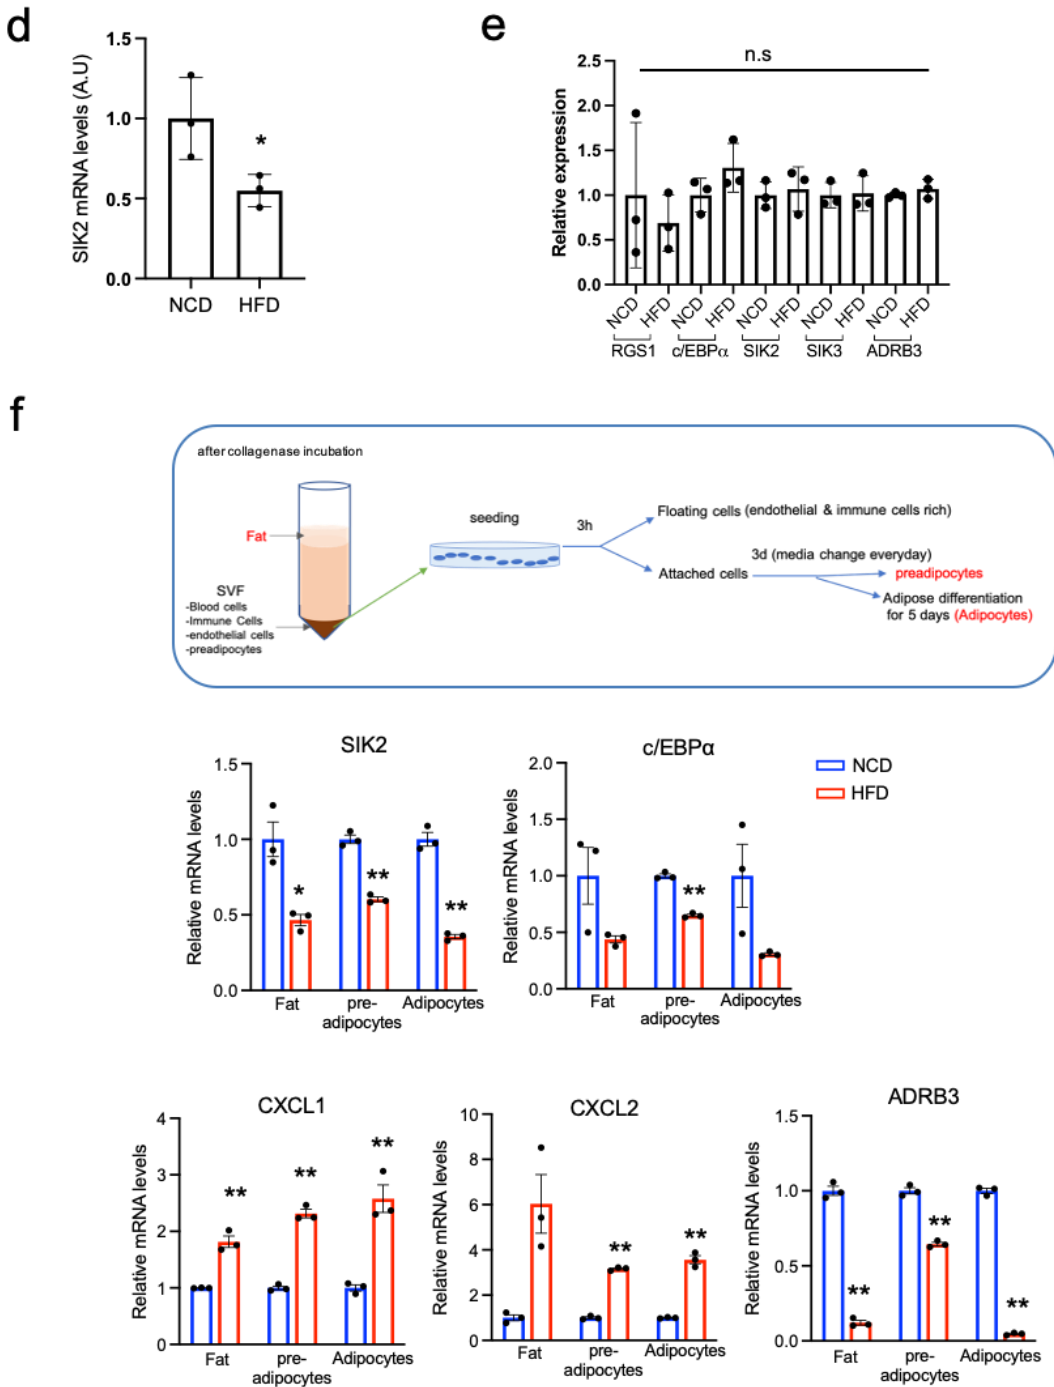

(continued)

**d.** q-PCR analysis of SIK2 expression in eWAT from age matched NCD and HFD fed (6weeks) mice in Fig.1e (\* $P < 0.05$ , t-test;  $n = 3$  per group). **e.** qPCR analysis showing gene expression in endothelial/hematopoietic (CD31<sup>+</sup>; CD45<sup>+</sup>; Ter119<sup>+</sup>) cells isolated from eWAT of NCD and 15 weeks HFD fed mice (t-test;  $n = 3$  per group). **f.** Top, Schematic diagram for isolating adipose cells. Bottom, qPCR analysis showing effect of HFD (15weeks) on gene expression in each cell fractions (\*\* $P < 0.01$ , \* $P < 0.05$ , t-test;  $n = 3$  per group). Data in **a**, **c-d** represent the mean  $\pm$  SEM and data in **e-f** represent the mean  $\pm$  SD.

**a****Brown pre-adipocytes**

|    | gene ID  | con  | Fsk   | log2(fold change) | q_value   |
|----|----------|------|-------|-------------------|-----------|
| 1  | Nr4a2    | 1.8  | 64.1  | 5.1               | 0.0137175 |
| 2  | Crem     | 7.0  | 187.0 | 4.7               | 0.0137175 |
| 3  | Gem      | 3.7  | 78.5  | 4.4               | 0.0137175 |
| 4  | Dgat1    | 8.4  | 169.0 | 4.3               | 0.0137175 |
| 5  | Star     | 4.6  | 88.0  | 4.2               | 0.0137175 |
| 6  | Dio2     | 1.4  | 22.9  | 4.0               | 0.0137175 |
| 7  | Vdr      | 17.4 | 268.9 | 3.9               | 0.0137175 |
| 8  | Nfil3    | 6.2  | 78.5  | 3.7               | 0.0137175 |
| 9  | Tnfaip6  | 6.3  | 78.7  | 3.6               | 0.0137175 |
| 10 | Uap1     | 55.1 | 615.9 | 3.5               | 0.0137175 |
| 11 | Kcne4    | 20.9 | 232.5 | 3.5               | 0.0137175 |
| 12 | Slc25a25 | 3.3  | 36.1  | 3.5               | 0.0137175 |
| 13 | Tuba4a   | 11.3 | 119.2 | 3.4               | 0.0137175 |
| 14 | Pde4d    | 4.3  | 45.0  | 3.4               | 0.0137175 |
| 15 | Procr    | 13.6 | 136.5 | 3.3               | 0.0137175 |
| 16 | Gfpt2    | 28.6 | 286.4 | 3.3               | 0.0137175 |
| 17 | Cxcl1    | 13.6 | 121.1 | 3.2               | 0.0137175 |
| 18 | Ier3     | 37.5 | 319.9 | 3.1               | 0.0137175 |
| 19 | Nmrk1    | 6.0  | 49.6  | 3.0               | 0.0415619 |
| 20 | Adams4   | 4.9  | 39.4  | 3.0               | 0.0137175 |

20 genes out of 23406 genes

**b**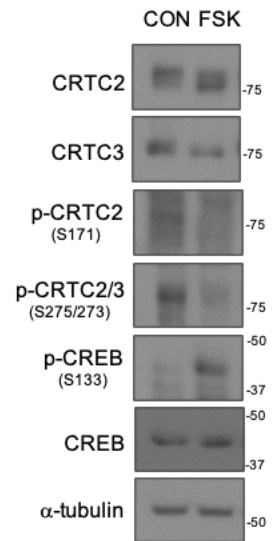**Supplementary Fig 2. CRTC dependent gene expression in primary pre-adipocytes.**

**a.** RNA-seq analysis of primary brown pre-adipocytes showing top 20 genes that are up-regulated more than 8-fold ( $\log FC > 3$ ) following exposure to FSK ( $10\mu\text{M}$  FSK, 1hr). **b.** Immunoblots showing CRTC2 and CRTC3 activation in primary brown pre-adipocytes following FSK treatment.

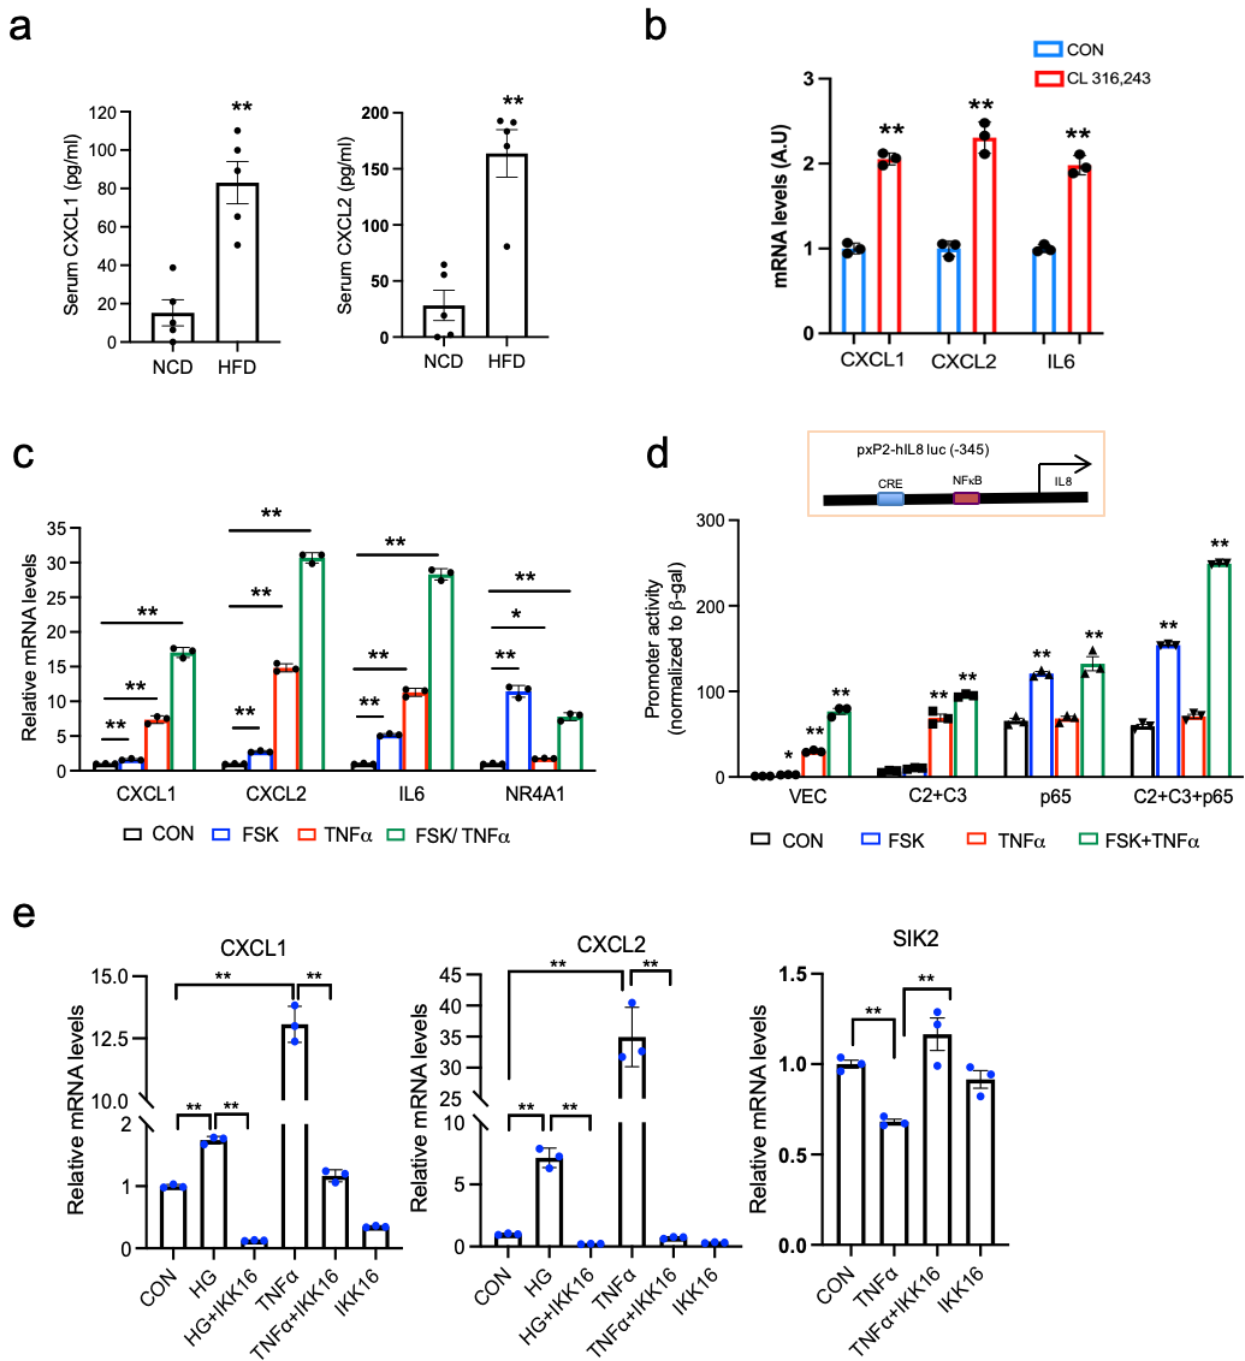

### Supplementary Fig 3. Regulation of cytokine genes by cAMP and TNF $\alpha$ .

**a.** Circulating concentrations of CXCL1 and CXCL2 maintained on a NCD or HFD for 15 weeks (\*\* $P < 0.01$ , t-test;  $n = 5$  per group). **b.** Effects of  $\beta_3$  adrenergic agonist CL316,243 on inflammatory gene expression in primary white adipocytes. All cells were differentiated for 7 days before exposure to CL316,243 (10  $\mu$ M, 1 hr) (\*\* $P < 0.01$ , t-test;  $n = 3$  per group). **c.** Effect of FSK and TNF $\alpha$  (2 hrs) alone and together on cytokine gene expression in differentiated 3T3L1 cells. Effect of FSK and TNF $\alpha$  on a CREB target gene (NR4A1) that lacks an NF- $\kappa$ B binding site (\*\* $P < 0.01$ , \* $P < 0.05$ , one-way ANOVA;  $n = 3$  per group). **d.** Cooperative effects of CRTC2/3 and p65 on human CXCL8 (IL8) expression. Relative effect of CRTC2 (C2), CRTC3 (C3) and p65 on human IL8 promoter activity in 293T cells shown. Luciferase activity normalized to RSV- $\beta$ -gal activity (\*\* $P < 0.01$ , \* $P < 0.05$ , one-way ANOVA;  $n = 3$  per group). **e.** Effect of NF $\kappa$ B signaling blockage on TNF $\alpha$  (10 ng/ml, 2 hrs) or HG9-91-01 (10  $\mu$ M, 2 hrs) induced CXCLs expression and TNF $\alpha$  (10 ng/ml, 6 hrs) induced SIK2 expression in white adipocytes. IKK inhibitor IKK16 (10  $\mu$ M) was treated 30 min prior to treatment with TNF $\alpha$  or HG9-91-01 (\*\* $P < 0.01$ , one-way ANOVA;  $n = 3$  per group). Data in **a.** represent the mean  $\pm$  SEM and **b-e** represent the mean  $\pm$  SD.

a

| KEGG pathway | Term                                   | Count | %         | P Value    | FDR        |
|--------------|----------------------------------------|-------|-----------|------------|------------|
| mmu05222     | Small cell lung cancer                 | 11    | 3.343465  | 8.31E-07   | 1.35E-04   |
| mmu04668     | TNF signaling pathway                  | 11    | 3.343465  | 9.14E-06   | 7.40E-04   |
| mmu04380     | Osteoclast differentiation             | 11    | 3.343465  | 3.28E-05   | 0.00177086 |
| mmu04512     | ECM-receptor interaction               | 9     | 2.7355623 | 7.96E-05   | 0.00322315 |
| mmu04510     | Focal adhesion                         | 13    | 3.9513678 | 1.18E-04   | 0.00349352 |
| mmu04060     | Cytokine-cytokine receptor interaction | 14    | 4.2553191 | 1.32E-04   | 0.00349352 |
| mmu04151     | PI3K-Akt signaling pathway             | 17    | 5.1671733 | 1.51E-04   | 0.00349352 |
| mmu04621     | NOD-like receptor signaling pathway    | 7     | 2.1276596 | 2.88E-04   | 0.00583738 |
| mmu04210     | Apoptosis                              | 7     | 2.1276596 | 3.82E-04   | 0.00688225 |
| mmu05200     | Pathways in cancer                     | 17    | 5.1671733 | 5.71E-04   | 0.00924298 |
| mmu04064     | NF-kappa B signaling pathway           | 8     | 2.4316109 | 9.24E-04   | 0.01360811 |
| mmu05145     | Toxoplasmosis                          | 8     | 2.4316109 | 0.00147249 | 0.01987865 |
| mmu05323     | Rheumatoid arthritis                   | 7     | 2.1276596 | 0.00200541 | 0.02499046 |

b

| Motif                                                                             | TF          | % of target | P_value |
|-----------------------------------------------------------------------------------|-------------|-------------|---------|
|  | NFkB-p65    | 35.15       | 1e-99   |
|  | JunB(bZIP)  | 37.87       | 1e-72   |
|  | CEBPA       | 29.97       | 1e-48   |
|  | STAT3       | 24.52       | 1e-29   |
|  | CREB (bZIP) | 35.97       | 1e-17   |

c

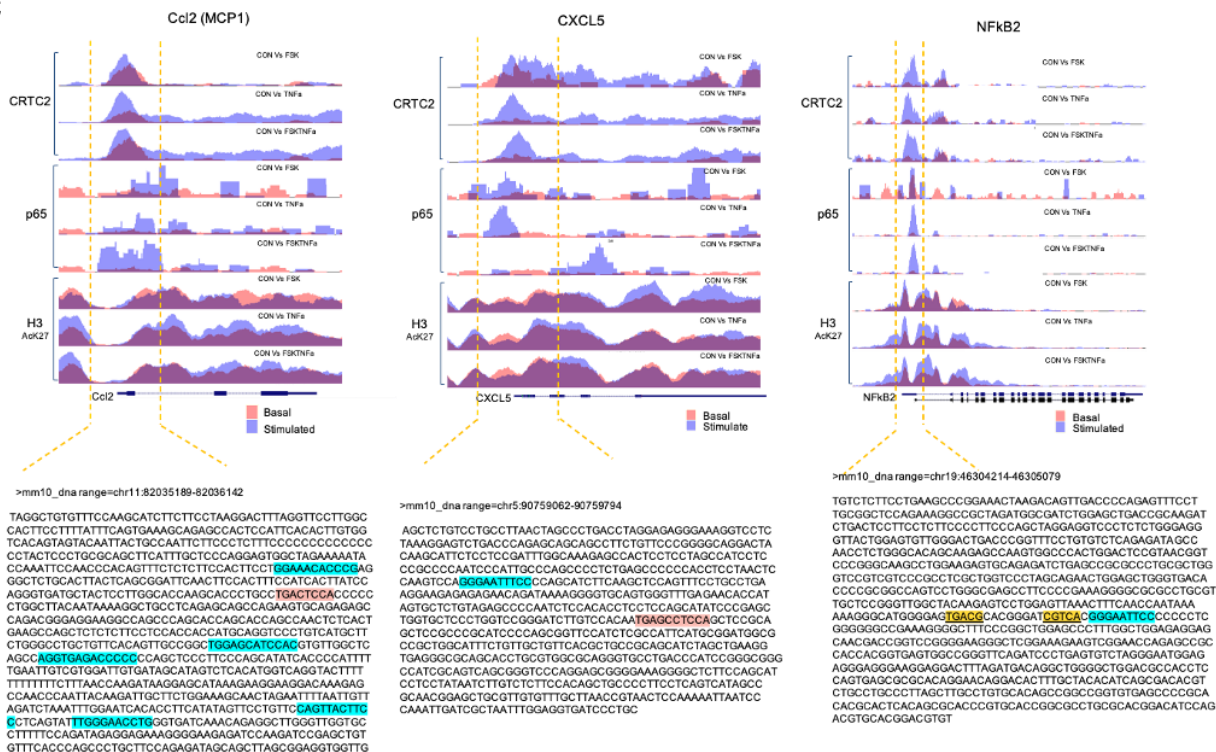

d

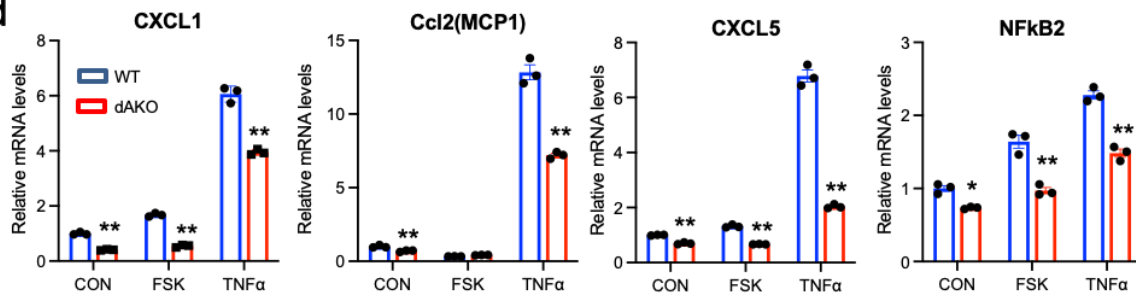

### Supplementary Fig 4. Regulation of CRTC2 and NF-κB co-occupancy.

**a.** Gene ontology analysis for CRTC2-p65 co-bound loci following 1hr exposure of 3T3-L1 adipocytes to TNF $\alpha$  and FSK. **b.** HOMER motif analysis of CRTC2-p65 co-bound loci showing top 5 binding motifs after 1hr exposure to TNF $\alpha$  and FSK (10 $\mu$ M). **c.** Genome browser plots showing ChIP-seq analysis of CRTC2, p65, and H3AcK27 occupancy over the mouse CCL2, CXCL5, and NFkB2 promoters in 4 day-differentiated 3T3-L1 adipocytes. Gene sequences corresponding to indicated peak area are shown. Blue, yellow, and red highlighting corresponds to putative NF- $\kappa$ B, CREB, and JUN/bZIP binding sites, respectively. **d.** mRNA amounts for NF- $\kappa$ B target genes in 5d differentiated white adipocytes from dAKO and WT mice following exposure to FSK (10 $\mu$ M) or TNF $\alpha$  (10ng/ml) for 1hr (\*\*P<0.01, \*P<0.05, t-test; n=3 per group). Data in **d** represent the mean  $\pm$  SD.

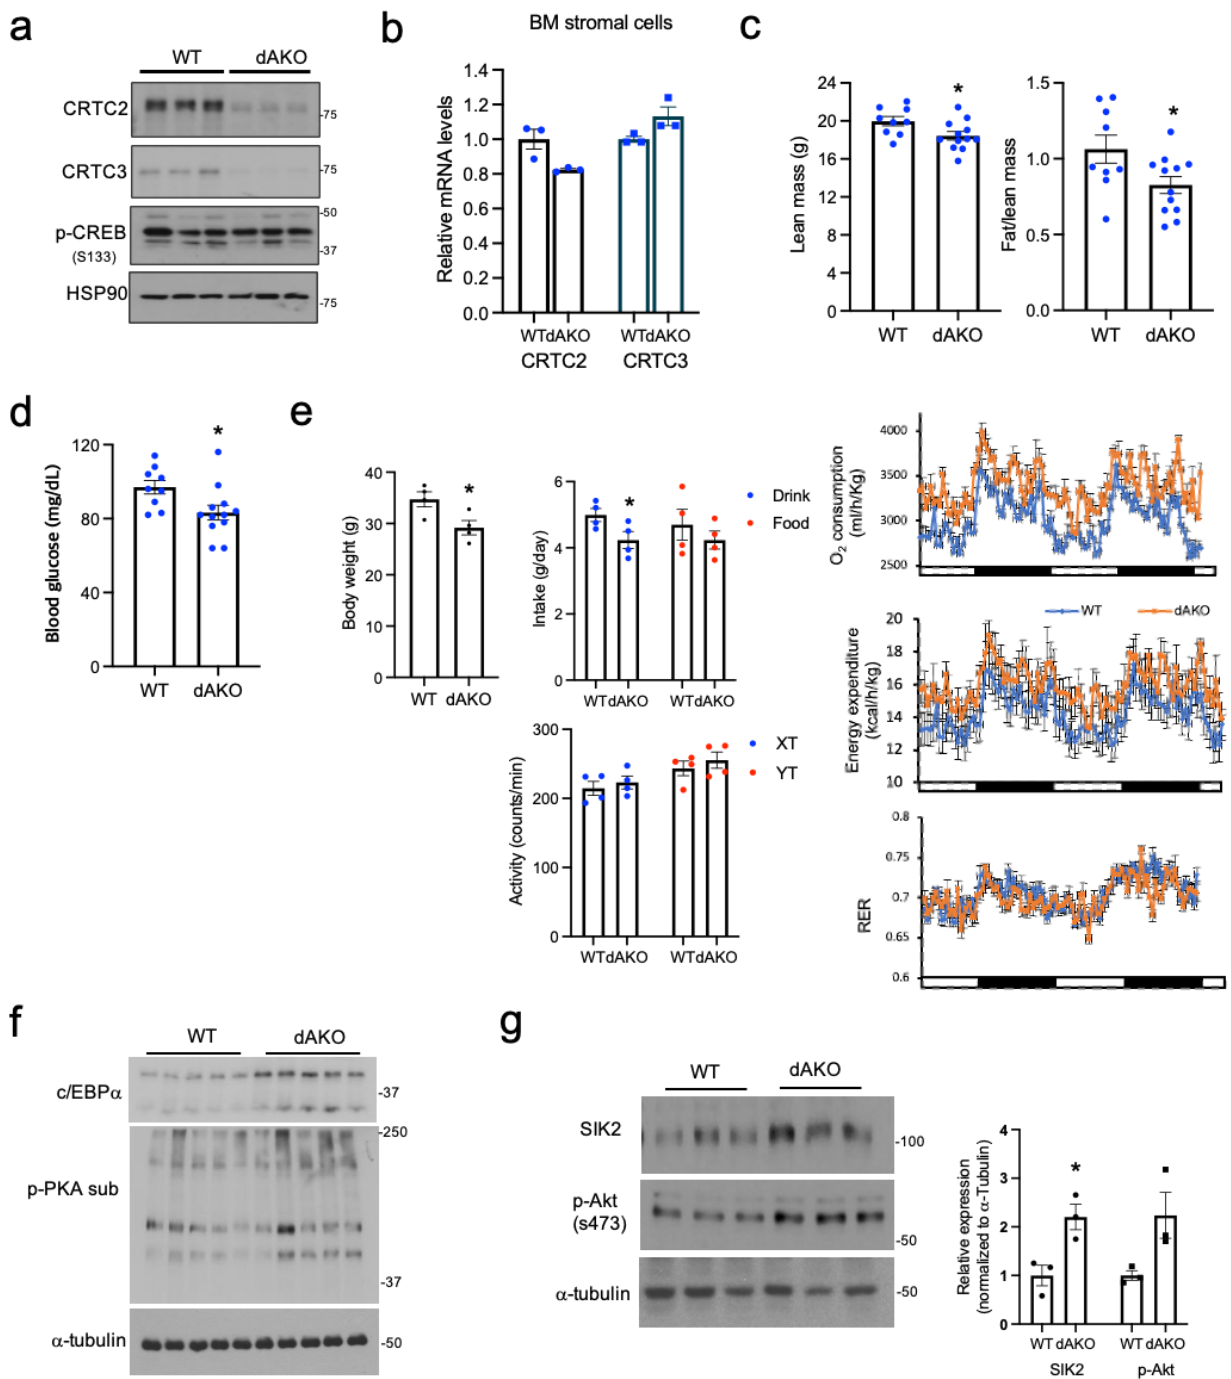

**Supplementary Fig 5. Characterization of CRTC2/3 dAKO mice.** **a.** Immunoblot analysis of CRTC2 and CRTC3 protein amounts in eWAT from dAKO and WT littermates after 12 weeks of HFD. **b.** mRNA amounts for CRTC2 and CRTC3 in bone marrow stromal cells from WT and dAKO mice. **c.** Body composition of dAKO and WT littermates (\* $P < 0.05$ , t-test;  $n = 9$ , 12 per group). Data are continued from Fig 4a. **d.** Blood glucose concentrations in dAKO and WT littermates after fasting for 18hrs (\* $P < 0.05$ , t-test;  $n = 9$ , 12 per group). Mice were fed an HFD for 12 weeks. **e.** Increased energy expenditure in dAKO mice. Indirect calorimetric analysis conducted for 48hrs following 72hrs adaptation in individual cages (\* $P < 0.05$ , t-test;  $n = 4$  per group). Mice were fed an HFD for 9 weeks. **f.** Immunoblot analysis showing effect of CRTC2/3 depletion on PKA substrate phosphorylation and c/EBP $\alpha$  expression. Mice were fed an HFD for 12 weeks. Each lane represents one mouse sample. **g.** Immunoblot showing effect of CRTC2/3 depletion on p-Akt (Ser 473) and SIK2 protein amounts in primary adipocytes from dAKO and WT littermates. Right, densitometry analysis for immunoblots shown (\* $P < 0.05$ , t-test;  $n = 3$  per group). Data in **b.** represents the mean  $\pm$  SD and **c-e, g** represent the mean  $\pm$  SEM.

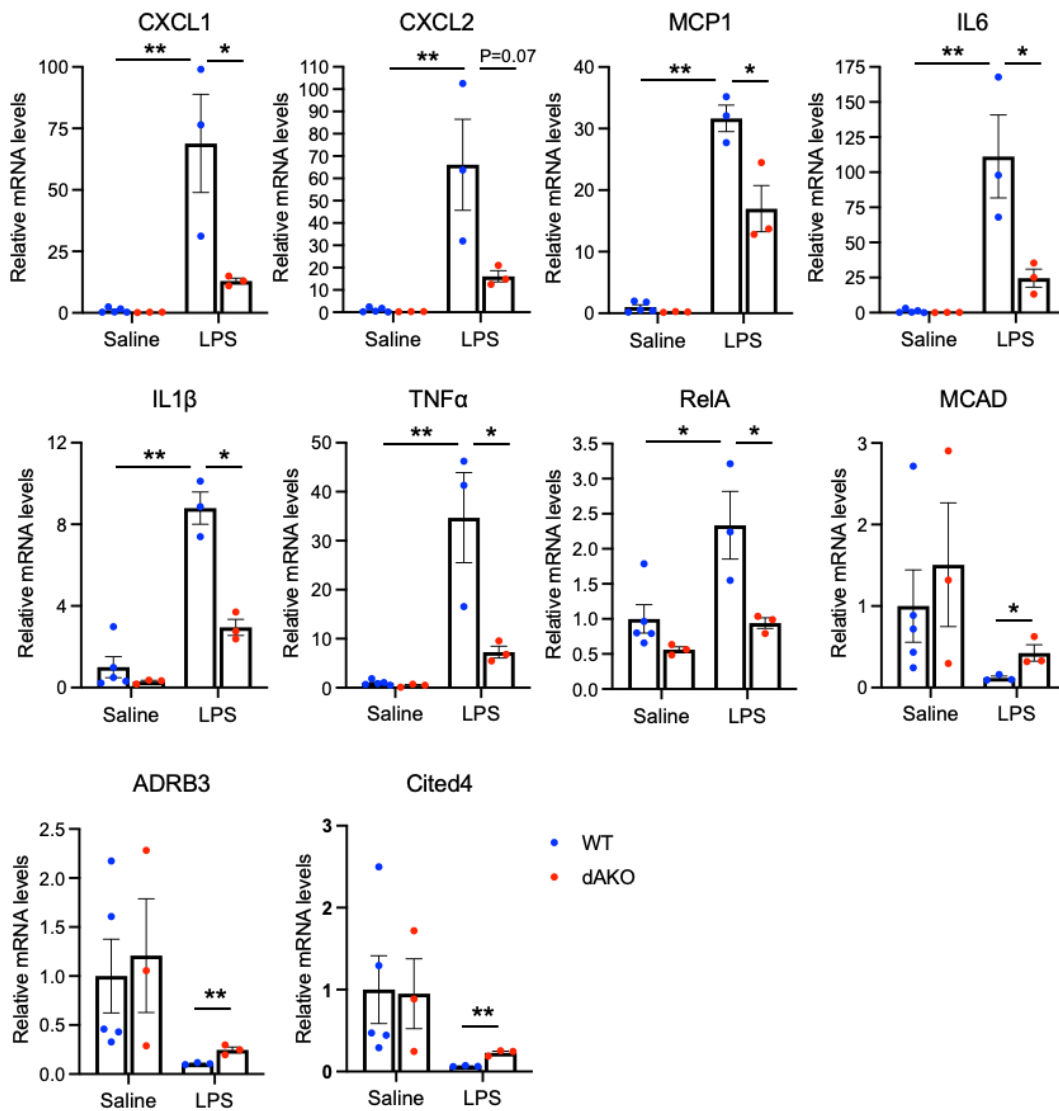

### Supplementary Fig 6. Downregulation of LPS-inducible inflammatory gene expression in dAKO WAT.

mRNA amounts for immune-related genes in eWAT from dAKO and WT littermates following administration of low dose LPS (500ng/kg) for 3hrs in 10 weeks old mice maintained on an NCD (\*\*P<0.01, \*P<0.05, t-test; n=3-5). Data represent the mean  $\pm$  SEM.



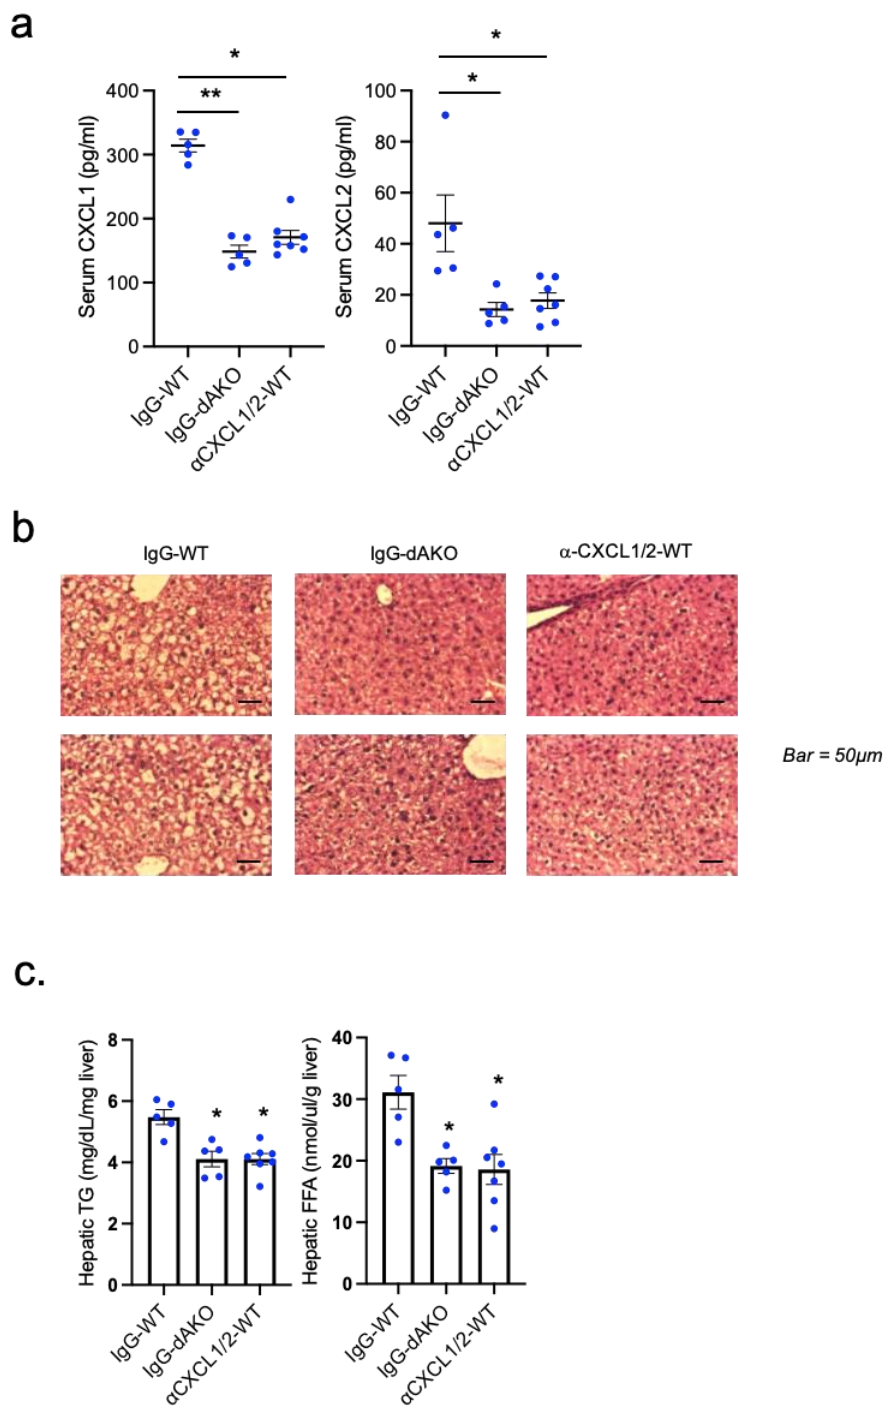

**Supplementary Fig 7. Neutralizing antibody against CXCL1 and CXCL2 reduces inflammation and improves lipid metabolism.**

**a.** Circulating levels of CXCL1 and CXCL2 (CXCL1/2) in IgG-injected WT, IgG-injected dAKO and  $\alpha$ -CXCL1/2-injected WT mice (\*\* $P < 0.01$ , \* $P < 0.05$ , one-way ANOVA;  $n = 5-7$ ). Mice were fed an HFD for 9 weeks. **b.** H&E staining performed on liver sections from IgG-injected WT, IgG-injected dAKO and  $\alpha$ -CXCL1/2 injected WT mice. Representative images from 5 mice are shown. **c.** Hepatic triglycerides (TG) and free fatty acids (FFA) in IgG-injected WT, IgG-injected dAKO and  $\alpha$ -CXCL1/2-injected WT mice (\*\* $P < 0.01$ , \* $P < 0.05$ , one-way ANOVA;  $n = 5-7$ ).

d

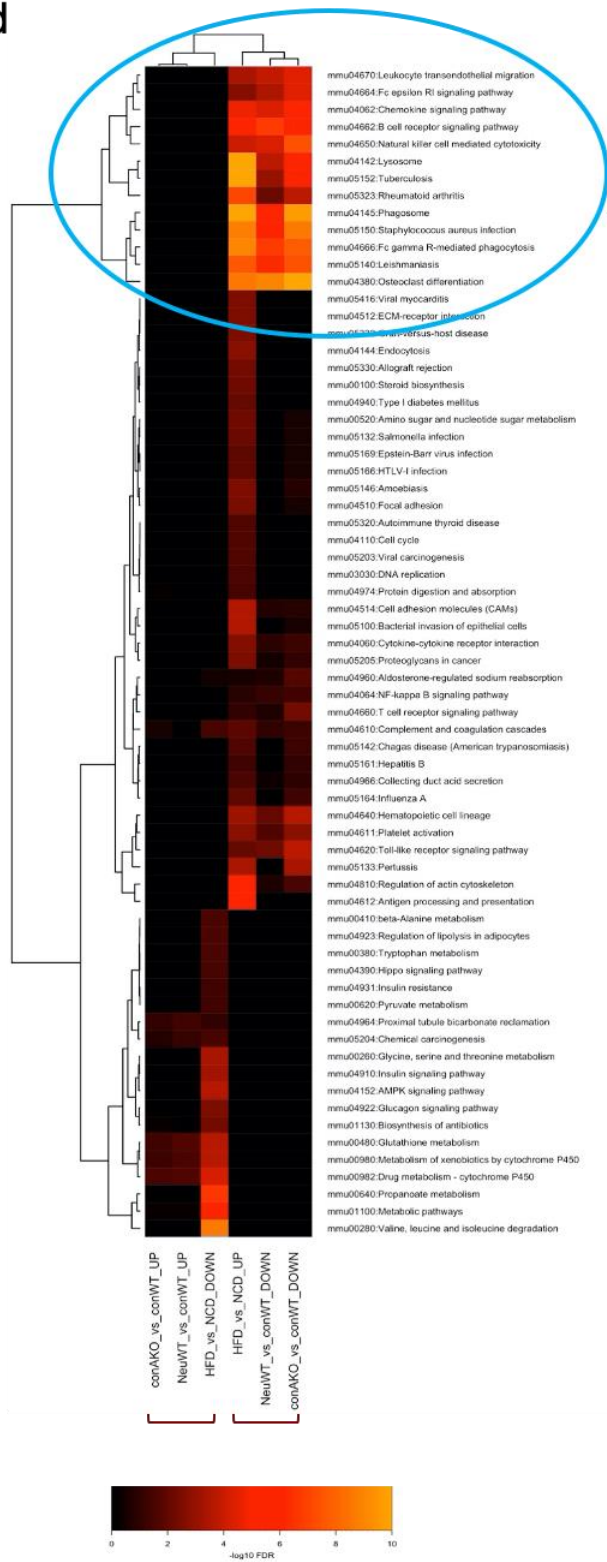

HFD\_vs\_NCD\_UP and  
 $\alpha$ -CXCL1/2 WT\_vs\_IgG WT\_DOWN,  
 IgG dAKO\_vs\_IgG WT\_DOWN genes share pathway terms related to  
 immune pathways

- mmu04670:Leukocyte transendothelial migration
- mmu04664:Fc epsilon RI signaling pathway
- mmu04062:Chemokine signaling pathway
- mmu04662:B cell receptor signaling pathway
- mmu04650:Natural killer cell mediated cytotoxicity
- mmu04142:Lysosome
- mmu05152:Tuberculosis
- mmu05323:Rheumatoid arthritis
- mmu04145:Phagosome
- mmu05150:Staphylococcus aureus infection
- mmu04666:Fc gamma R-mediated phagocytosis
- mmu05140:Leishmaniasis
- mmu04380:Osteoclast differentiation

(continued)

**d.** Heat map from gene expression profile and gene ontology analysis of IgG-WT, IgG-dAKO and  $\alpha$ -CXCL1/2-WT mice. Heat map generated from gene expression profile and gene ontology analysis of Fig.1 and Fig.5. Genes that differ more than 2-fold (log FC >1) with a q value (adjusted p-value) less than 0.05 (n=3 per group) shown. Data in **a** and **c** represent the mean  $\pm$  SEM.

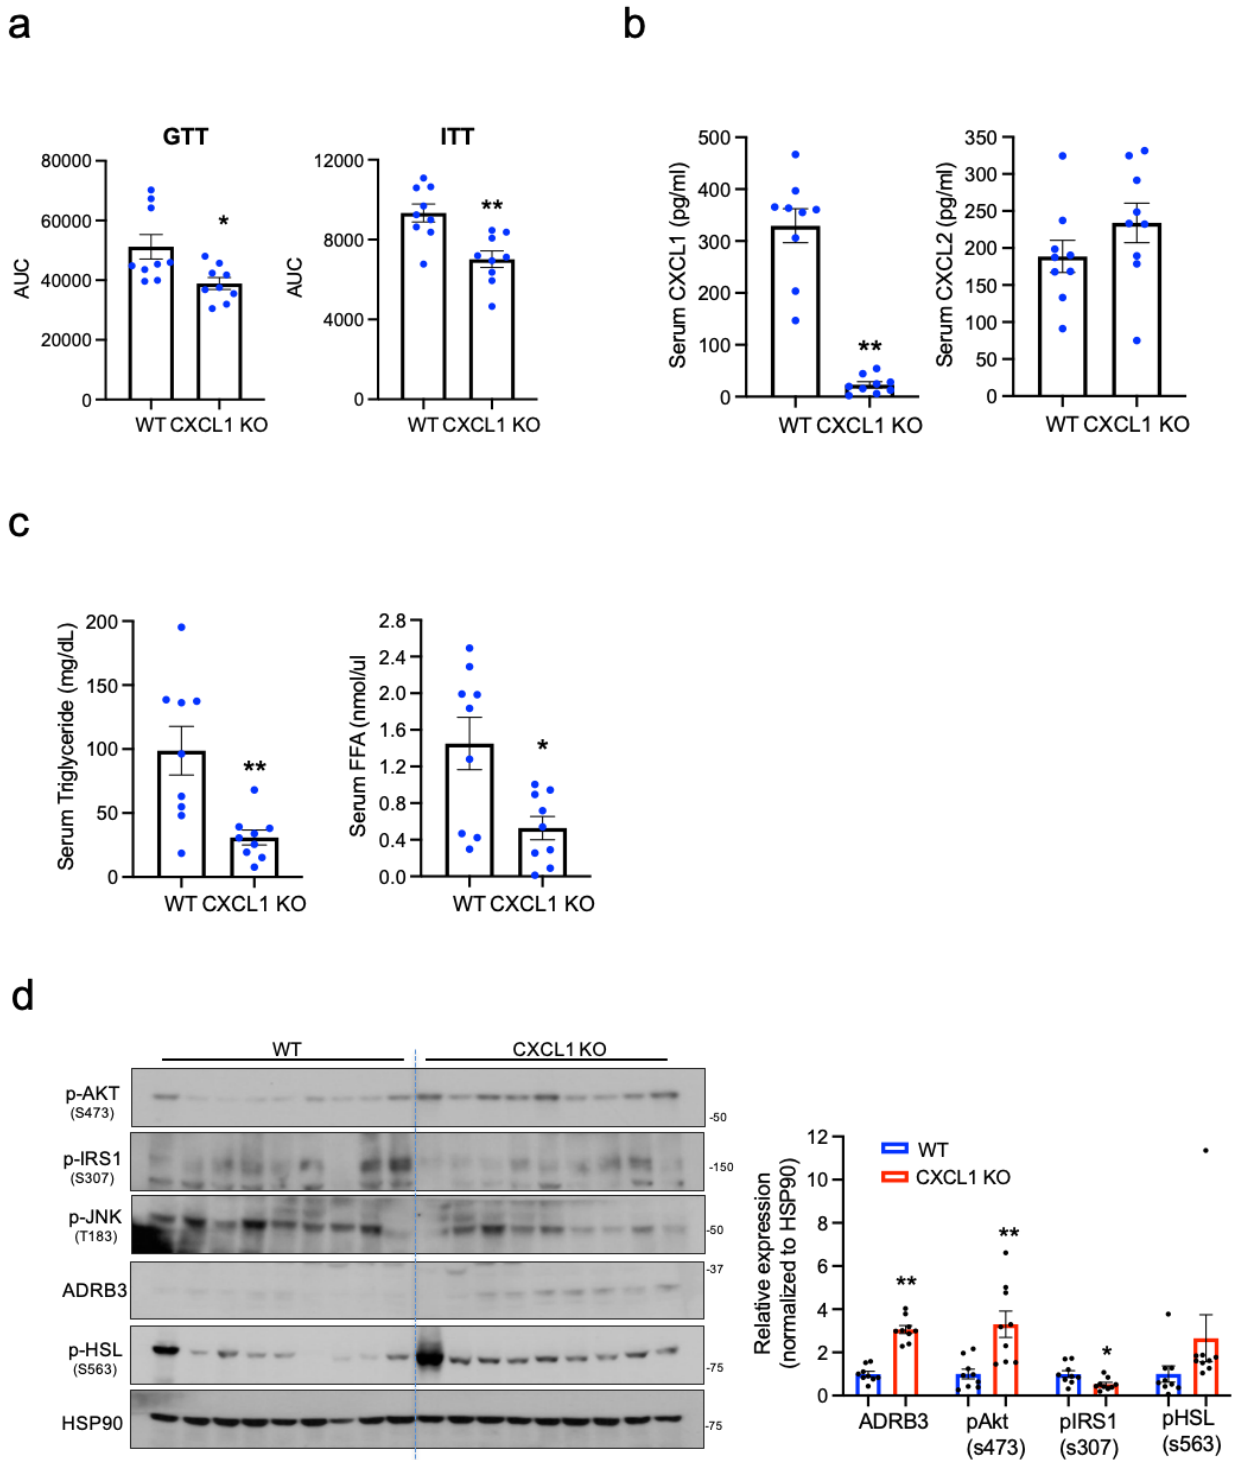

**Supplementary Fig 8. Improved triglyceride metabolism in CXCL1 knockout mice.**

**a.** Area under curve (AUC) for Fig.6b (\*\* $P < 0.01$ , \* $P < 0.05$ , t-test;  $n = 9$  per group). **b.** Circulating CXCL1 and CXCL2 in CXCL1 KO mice and WT littermates after 10 weeks of HFD feeding (\*\* $P < 0.01$ , t-test;  $n = 9$  per group). **c.** Circulating triglyceride (TG) and free fatty acid (FFA) concentrations in serum from CXCL1 KO mice and WT littermates after 10 weeks of HFD feeding (\*\* $P < 0.01$ , \* $P < 0.05$ , t-test;  $n = 9$  per group). **d.** Immunoblot analysis of eWAT from HFD-fed CXCL1 KO and WT littermates showing effect of CXCL1 depletion on insulin, stress, and catecholamine signaling pathways. Right, densitometry analysis for immunoblots shown. Data in **a-d** represent the mean  $\pm$  SEM.

**a**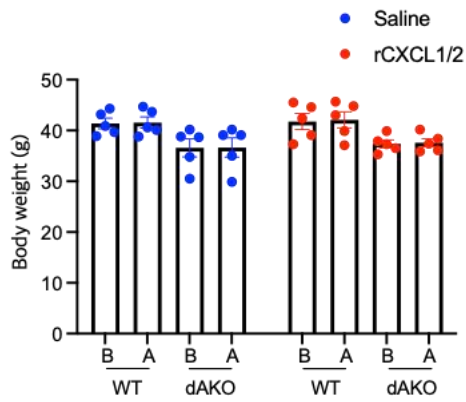**b**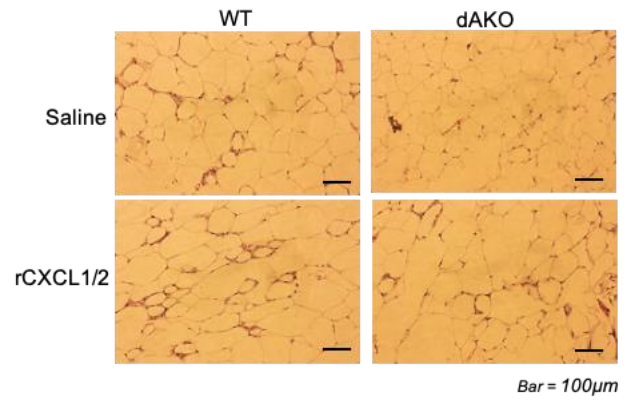**Supplementary Fig 9. The role of CXCL1/2 on CRTC dAKO mediated regulation.**

**a.** Body weight of WT and dAKO mice before (B) and after (A) injection of recombinant CXCL1/2 or Saline shown. Data represent the mean  $\pm$  SEM. **b.** H&E staining of eWAT showing effect of rCXCL1/2 injection in WT and dAKO mice. Representative images shown from 5 mice per group.

**a. Uncropped blots for Fig. 1d**

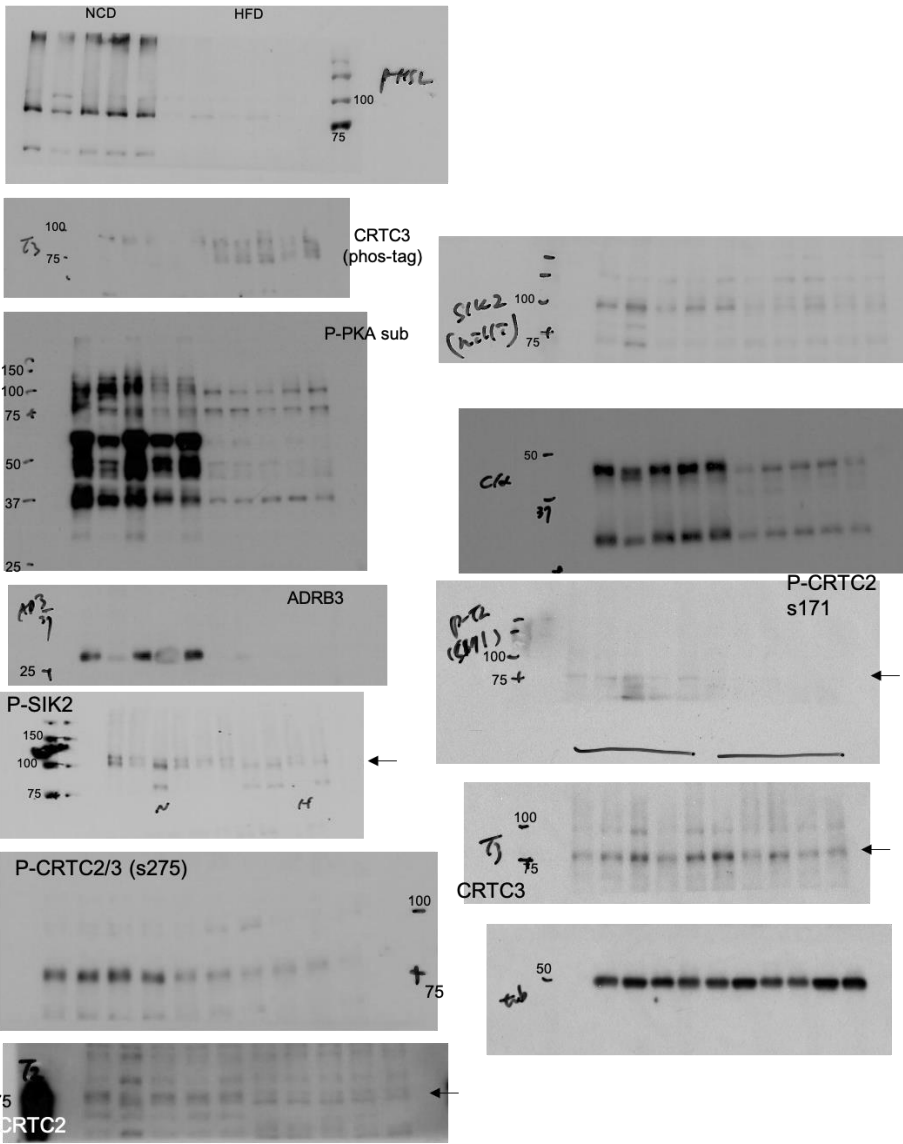

**b. Uncropped blots for Fig. 1d**

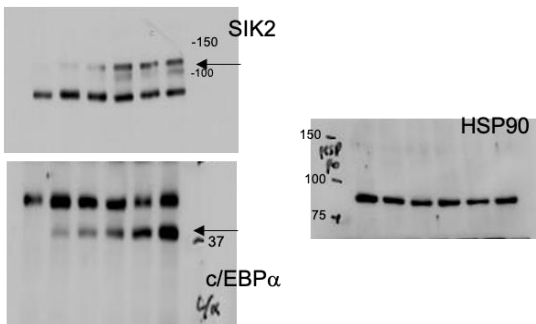

**c. Uncropped blots for Fig. 2e**

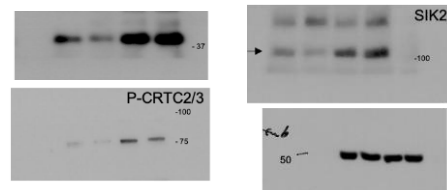

**Supplementary Fig 10. Uncropped blots**

**d. Uncropped blots for Fig. 2f**

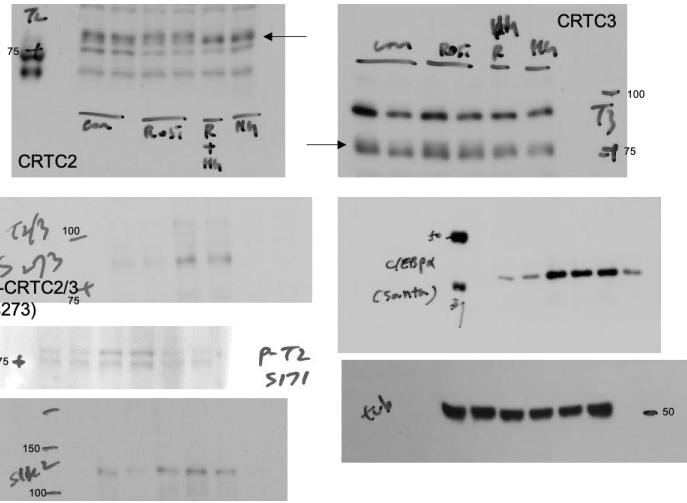

**e. Uncropped blots for Fig. 2g**

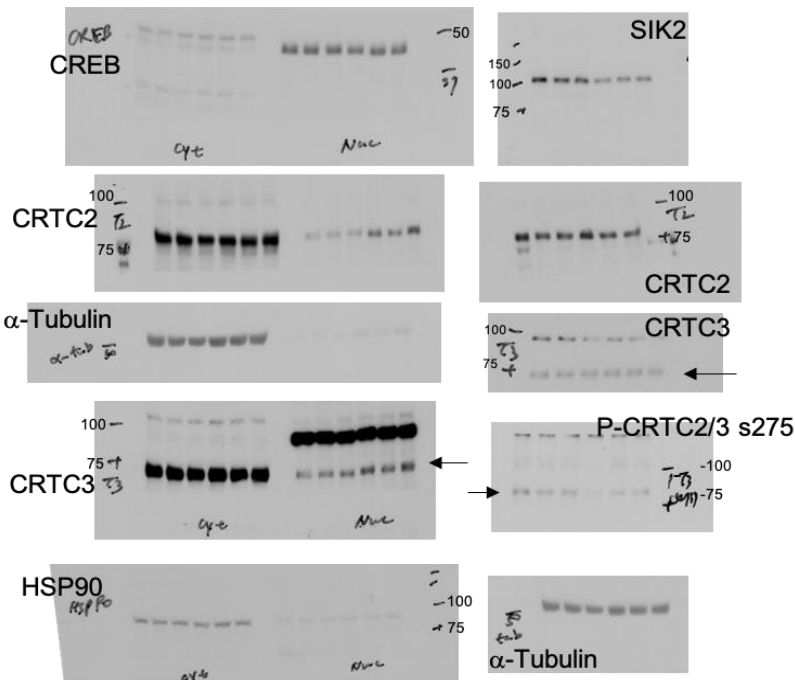

**f. Uncropped blots for Fig. 5d**

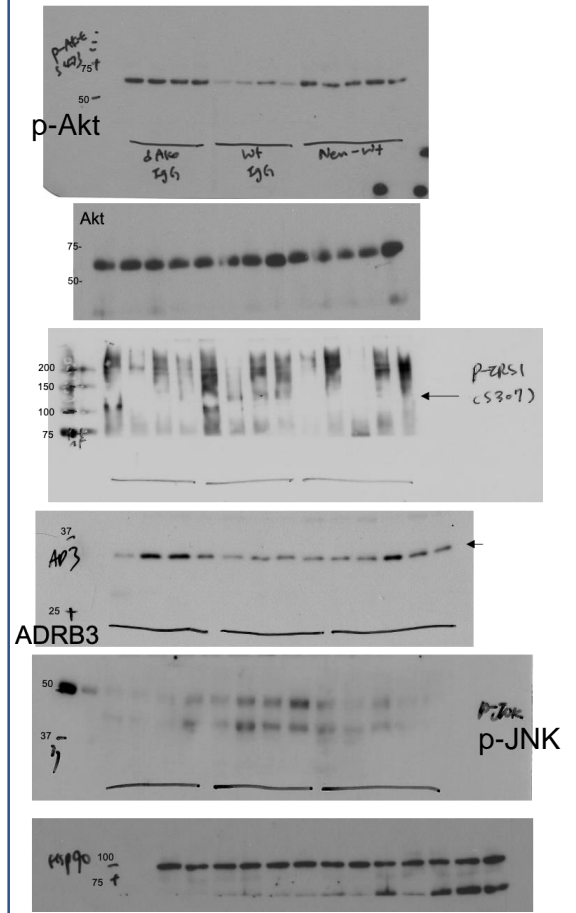

**Supplementary Fig 10. Uncropped blots**

**g. Uncropped blots for Fig. 6e**

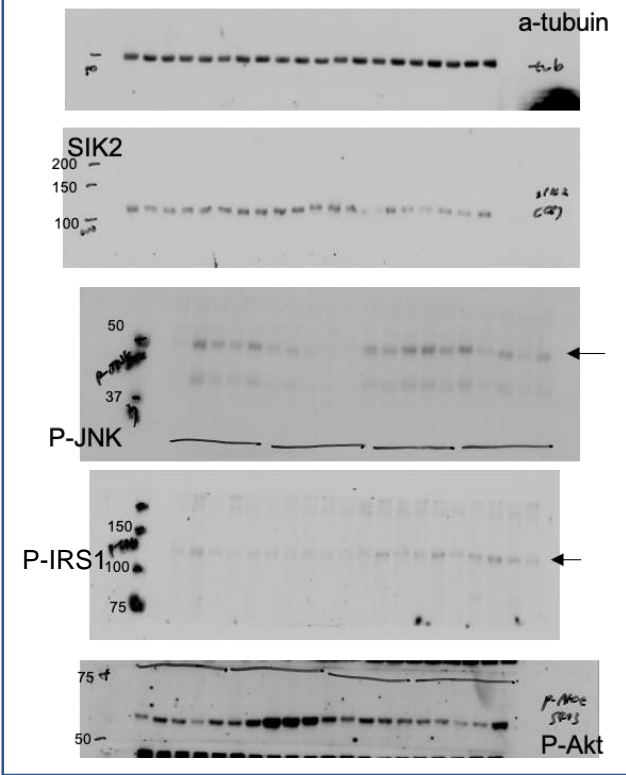

**h. Uncropped blots for Fig. 7b**

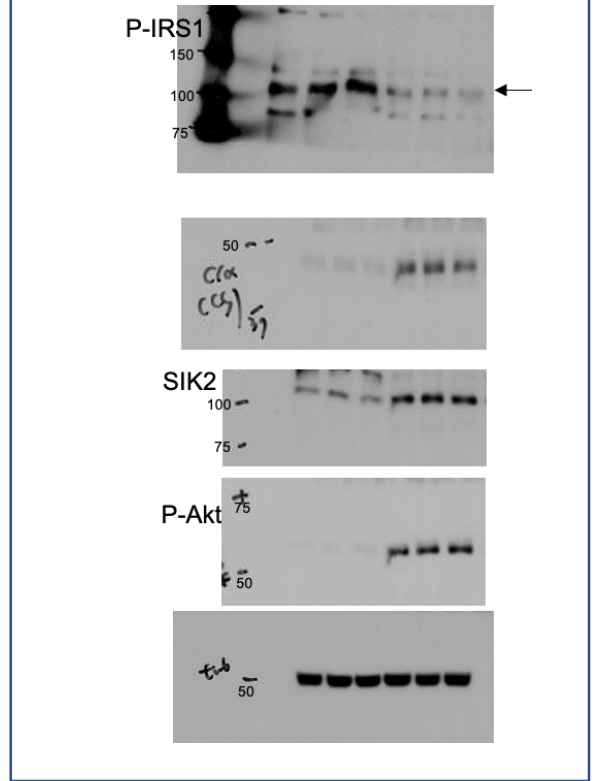

**Supplementary Fig 10. Uncropped blots**

**Supplementary Table 1.** All of the genes that are significantly up-regulated upon FSK treatment shown in Supplementary Fig.2

|    | gene     | locus                     | CON     | FSK     | log2 FC | p value  | q value  |
|----|----------|---------------------------|---------|---------|---------|----------|----------|
| 1  | Nr4a2    | chr2:57107225-57124003    | 1.81471 | 64.0793 | 5.14205 | 5.00E-05 | 0.013718 |
| 2  | Creb     | chr18:3266353-3366863     | 7.00069 | 187.006 | 4.73944 | 5.00E-05 | 0.013718 |
| 3  | Gem      | chr4:11704446-11714993    | 3.65739 | 78.5121 | 4.42403 | 5.00E-05 | 0.013718 |
| 4  | Dgat1    | chr15:76502014-76511818   | 8.40065 | 168.972 | 4.33014 | 5.00E-05 | 0.013718 |
| 5  | Star     | chr8:25808512-25815982    | 4.6266  | 88.0137 | 4.24971 | 5.00E-05 | 0.013718 |
| 6  | Dio2     | chr12:90724551-90738438   | 1.39581 | 22.9352 | 4.03838 | 5.00E-05 | 0.013718 |
| 7  | Vdr      | chr15:97854426-97908296   | 17.4382 | 268.946 | 3.94699 | 5.00E-05 | 0.013718 |
| 8  | Nfil3    | chr13:52967208-52981039   | 6.19493 | 78.5003 | 3.66354 | 5.00E-05 | 0.013718 |
| 9  | Tnfrsf6  | chr2:52038112-52056681    | 6.30162 | 78.7458 | 3.64341 | 5.00E-05 | 0.013718 |
| 10 | Uap1     | chr1:170142002-170174946  | 55.0574 | 615.909 | 3.48371 | 5.00E-05 | 0.013718 |
| 11 | Kcne4    | chr1:78816948-78820025    | 20.9258 | 232.512 | 3.47395 | 5.00E-05 | 0.013718 |
| 12 | Slc25a25 | chr2:32414486-32455476    | 3.29954 | 36.0958 | 3.45149 | 5.00E-05 | 0.013718 |
| 13 | Tuba4a   | chr1:75210828-75219253    | 11.2557 | 119.173 | 3.40432 | 5.00E-05 | 0.013718 |
| 14 | Pde4d    | chr13:108654176-109955969 | 4.26573 | 44.9586 | 3.39773 | 5.00E-05 | 0.013718 |
| 15 | Procr    | chr2:155751216-155755478  | 13.588  | 136.507 | 3.32856 | 5.00E-05 | 0.013718 |
| 16 | Gfpt2    | chr11:49794154-49838620   | 28.6251 | 286.436 | 3.32286 | 5.00E-05 | 0.013718 |
| 17 | Cxcl1    | chr5:90891244-90893115    | 13.6161 | 121.119 | 3.15304 | 5.00E-05 | 0.013718 |
| 18 | Ier3     | chr17:35821712-35822911   | 37.4684 | 319.875 | 3.09376 | 5.00E-05 | 0.013718 |
| 19 | Nmrk1    | chr19:18632015-18652184   | 6.00127 | 49.594  | 3.04683 | 0.0002   | 0.041562 |
| 20 | Adamts4  | chr1:171250421-171259922  | 4.94603 | 39.3649 | 2.99257 | 5.00E-05 | 0.013718 |
| 21 | Adamts9  | chr6:92772698-92901441    | 3.07958 | 23.843  | 2.95276 | 5.00E-05 | 0.013718 |
| 22 | Sik1     | chr17:31844249-31855792   | 2.30822 | 17.7126 | 2.93992 | 5.00E-05 | 0.013718 |
| 23 | Lif      | chr11:4257567-4272514     | 5.54307 | 41.4847 | 2.90382 | 5.00E-05 | 0.013718 |
| 24 | Gpr153   | chr4:152274361-152285337  | 3.89162 | 28.7483 | 2.88503 | 5.00E-05 | 0.013718 |
| 25 | Fgl2     | chr5:21292960-21424677    | 2.79536 | 18.8952 | 2.75691 | 0.0001   | 0.02411  |
| 26 | Jarid2   | chr13:44730773-44921643   | 3.07193 | 19.8347 | 2.69081 | 5.00E-05 | 0.013718 |
| 27 | Armdc3   | chr13:80883421-80896043   | 7.50407 | 45.8465 | 2.61107 | 5.00E-05 | 0.013718 |
| 28 | Plau     | chr14:20836661-20843388   | 28.5974 | 173.219 | 2.59864 | 5.00E-05 | 0.013718 |
| 29 | Slc16a1  | chr3:104638667-104658462  | 10.5667 | 63.0647 | 2.57731 | 5.00E-05 | 0.013718 |
| 30 | Ii6      | chr5:30013160-30019968    | 169.221 | 947.157 | 2.48469 | 5.00E-05 | 0.013718 |
| 31 | Emd      | chrX:74254838-74257747    | 50.8308 | 262.959 | 2.37107 | 5.00E-05 | 0.013718 |
| 32 | Ugdh     | chr5:65413221-65435842    | 163.999 | 842.094 | 2.36029 | 5.00E-05 | 0.013718 |
| 33 | Ii11     | chr7:4772377-4778141      | 14.6416 | 73.6977 | 2.33155 | 5.00E-05 | 0.013718 |
| 34 | Spsb1    | chr4:149896283-149955006  | 6.69612 | 33.047  | 2.30312 | 0.0001   | 0.02411  |
| 35 | Synpo2   | chr3:123076518-123236149  | 2.19516 | 10.7255 | 2.28865 | 0.00025  | 0.047682 |
| 36 | Ndrq1    | chr15:66929317-66969641   | 11.3652 | 55.1332 | 2.2783  | 0.0001   | 0.02411  |
| 37 | Rpl41    | chr10:128548109-128549168 | 152.067 | 735.95  | 2.2749  | 5.00E-05 | 0.013718 |
| 38 | Isg15    | chr4:156199423-156200818  | 36.0359 | 172.968 | 2.26299 | 0.00015  | 0.032633 |
| 39 | Smim3    | chr18:60474190-60501983   | 13.7557 | 64.8186 | 2.23638 | 0.0002   | 0.041562 |
| 40 | Cxcr7    | chr1:90203979-90215722    | 12.7857 | 59.5117 | 2.21864 | 5.00E-05 | 0.013718 |
| 41 | Thbd     | chr2:148404470-148408188  | 73.4222 | 341.357 | 2.21699 | 5.00E-05 | 0.013718 |
| 42 | Gadd45a  | chr6:67035095-67080652    | 27.741  | 128.938 | 2.21658 | 5.00E-05 | 0.013718 |
| 43 | Isy1     | chr6:87818447-87838759    | 13.7804 | 63.85   | 2.21207 | 0.00025  | 0.047682 |
| 44 | Ubb      | chr11:62551503-62553212   | 66.4351 | 268.837 | 2.01672 | 5.00E-05 | 0.013718 |
| 45 | Tubb2a   | chr13:34074279-34078008   | 32.7727 | 126.716 | 1.95104 | 0.00025  | 0.047682 |
| 46 | Bag3     | chr7:128523582-128546979  | 35.2131 | 132.612 | 1.91303 | 0.00015  | 0.032633 |
| 47 | Efemp2   | chr19:5474689-5481854     | 80.1825 | 259.859 | 1.69637 | 0.0002   | 0.041562 |



Fig 3a

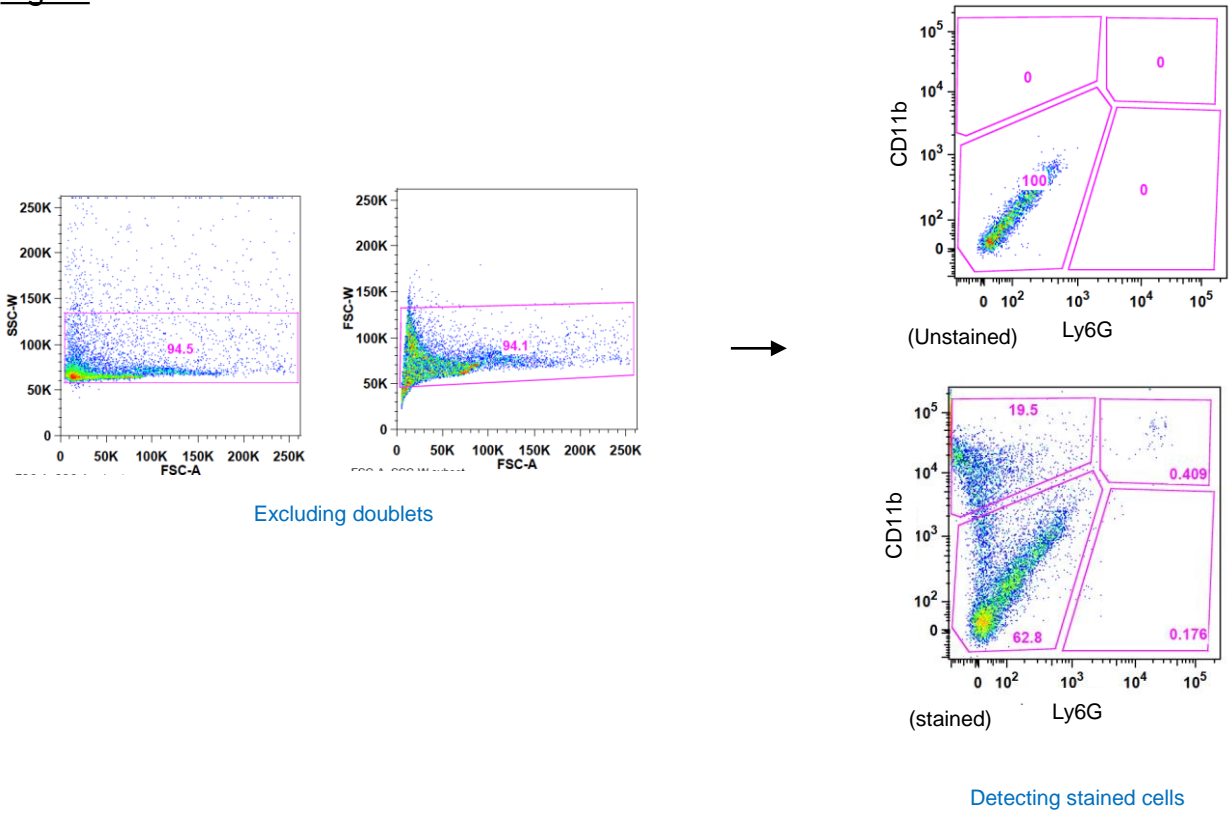

Fig 4f

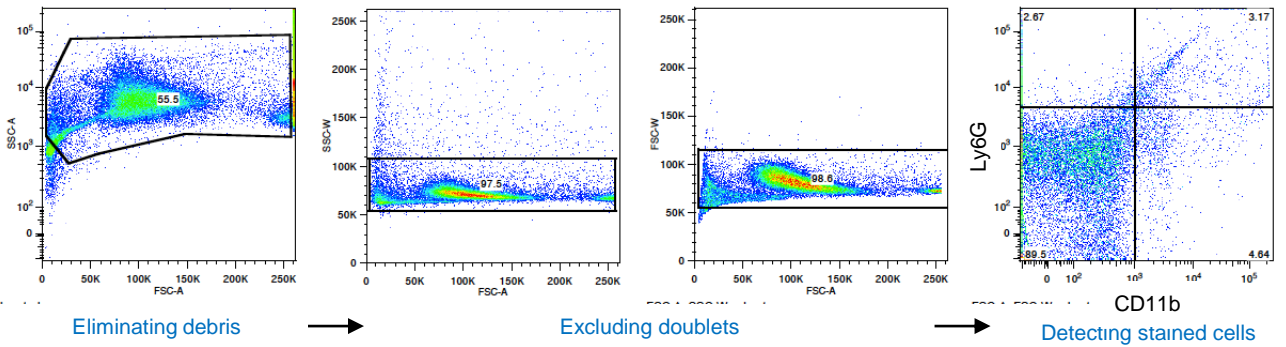

Supplemental item1. Representative gating strategy for neutrophils CD11b+;Ly6g+ (in Fig3a, 4f)

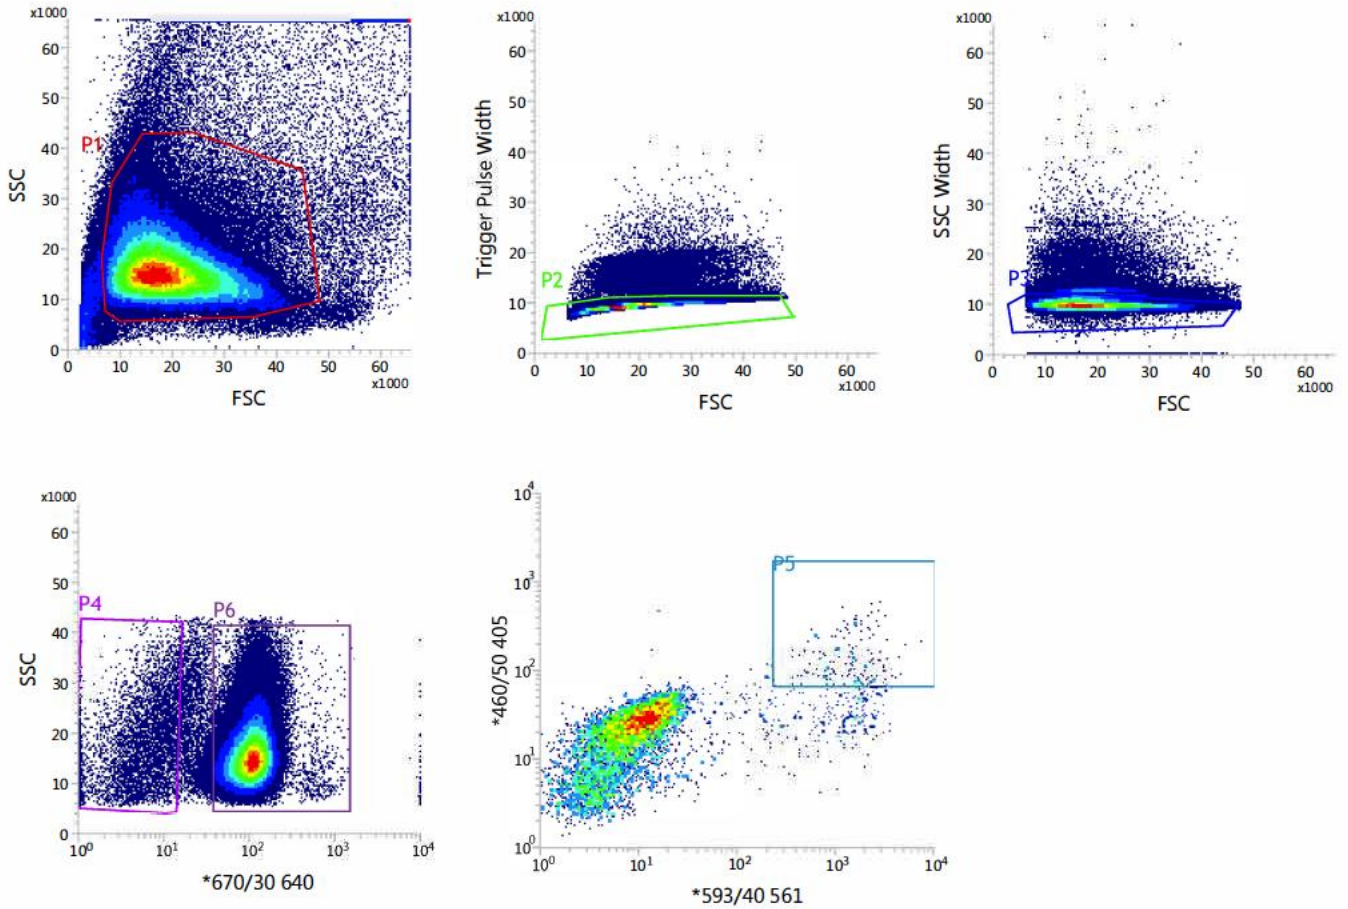

Populations: NC

| Populations | Even... | % Total | % Parent |                                            |
|-------------|---------|---------|----------|--------------------------------------------|
| All Events  | 392,866 | 100.00% | ####     |                                            |
| P1          | 365,511 | 93.04%  | 93.04%   | -Live cells                                |
| P2          | 351,101 | 89.37%  | 96.06%   | } excluding doublets                       |
| P3          | 310,186 | 78.95%  | 88.35%   |                                            |
| P4          | 5,069   | 1.29%   | 1.63%    | -unstained cells or lineage negative cells |
| P5          | 154     | 0.04%   | 3.04%    | -lineage negative cells                    |
| P6          | 300,753 | 76.55%  | 96.96%   | -APC CD31; CD45; Ter119 positive cells     |

Supplemental item2. Representative gating strategy for lineage positive cells (in Supplementary Fig 1e)
