# Supplementary material for: Activation of the adipocyte CREB/CRTC pathway in obesity
Source: PubMed Central journal article supplement (PMC8536733; doi:10.1038/s42003-021-02735-5), 2021-10-22
Supplement: 42003_2021_2735_MOESM2_ESM.pdf [file 42003_2021_2735_MOESM2_ESM.pdf]

## Description of Additional Supplementary Files

**File name:** Supplementary Data.

**Description:** Source Data for figures 1c-7c.
